# Supplementary material for: Non-Silent Story on Synonymous Sites in Voltage-Gated Ion Channel Genes
Source: PLOS journal article supplement (doi:10.1371/journal.pone.0048541), 2012-10-31
Supplement: S1 (10.1371/journal.pone.0048541.s001) [file journal.pone.0048541.s001]

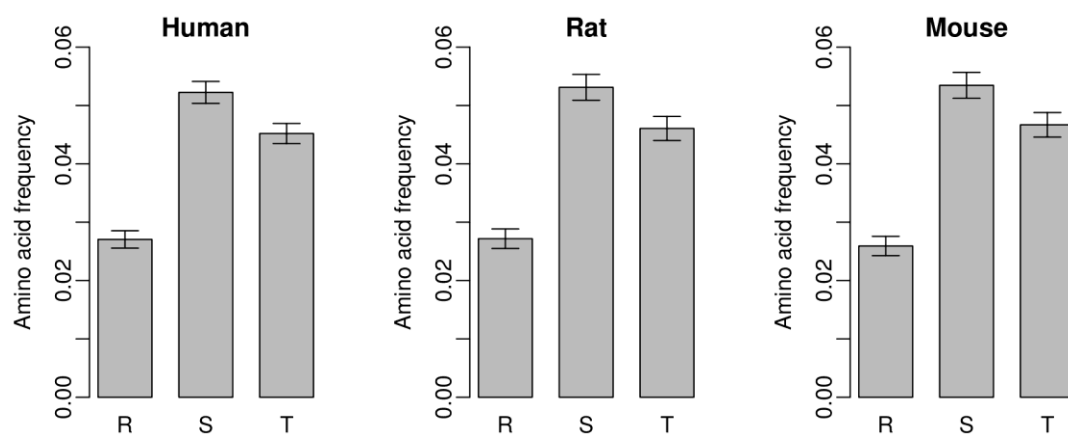

**Figure S1.** Amino acid frequency at transmembrane sites for arginine (R), serine (S), and threonine (T). The mean frequencies of S and T are significantly higher than that of R in human, rat, and mouse ( $P < 10^{-10}$  by t-test). The errors indicate the standard errors.
